# Supplementary material for: Protection of lithium anodes by fibrous silica nanospheres
Source: Royal Society of Chemistry journal article supplement (doi:10.1039/c9ra09481d), 2020-01-01
Supplement: c9ra09481d1.pdf [file c9ra09481d1.pdf]

# Protection of Lithium Anode by Fibrous Silica Nanospheres

Jinxin Fan<sup>a</sup>, Yu Luo<sup>b</sup>, Keliang Jiang<sup>a</sup>, Cheng Wang<sup>a\*</sup>

<sup>a</sup> *Institute for New Energy Materials & Low-Carbon Technologies, School of Material Science and Engineering, Tianjin University of Technology, Tianjin, 300384, China*

<sup>b</sup> *Weifang Institute for Product Quality Inspection, Weifang, Shandong, 261000, China*

\*Corresponding author

*E-mail address: cwang@tjut.edu.cn*

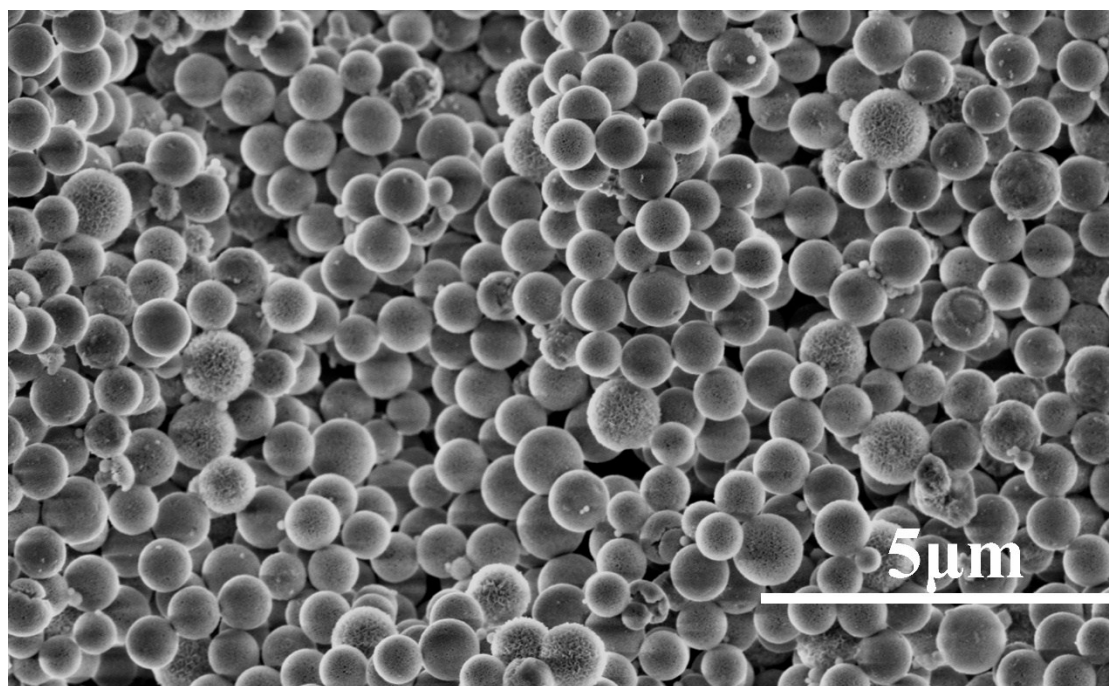

**Figure S1.** SEM image of FSNSs.

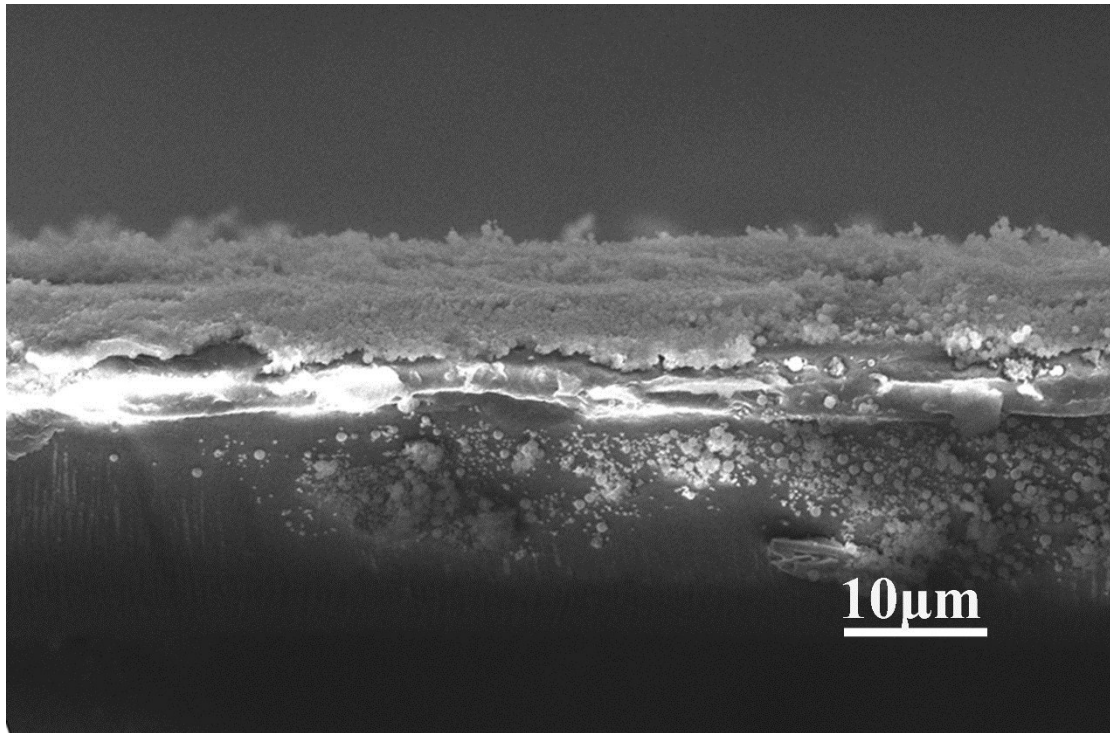

**Figure S2.** Cross-sectional SEM image of FSNSs coating.

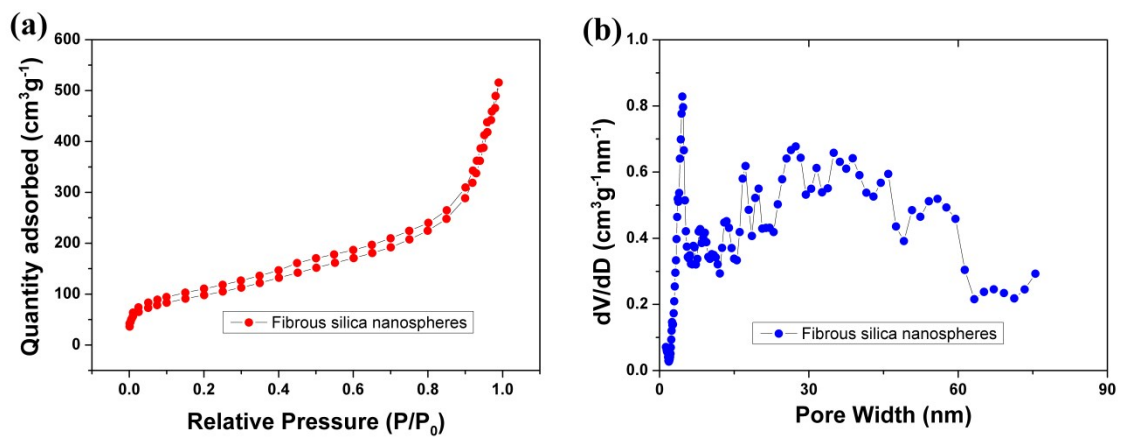

**Figure S3**  $N_2$  adsorption isotherms and pore size distribution of FSNSs.

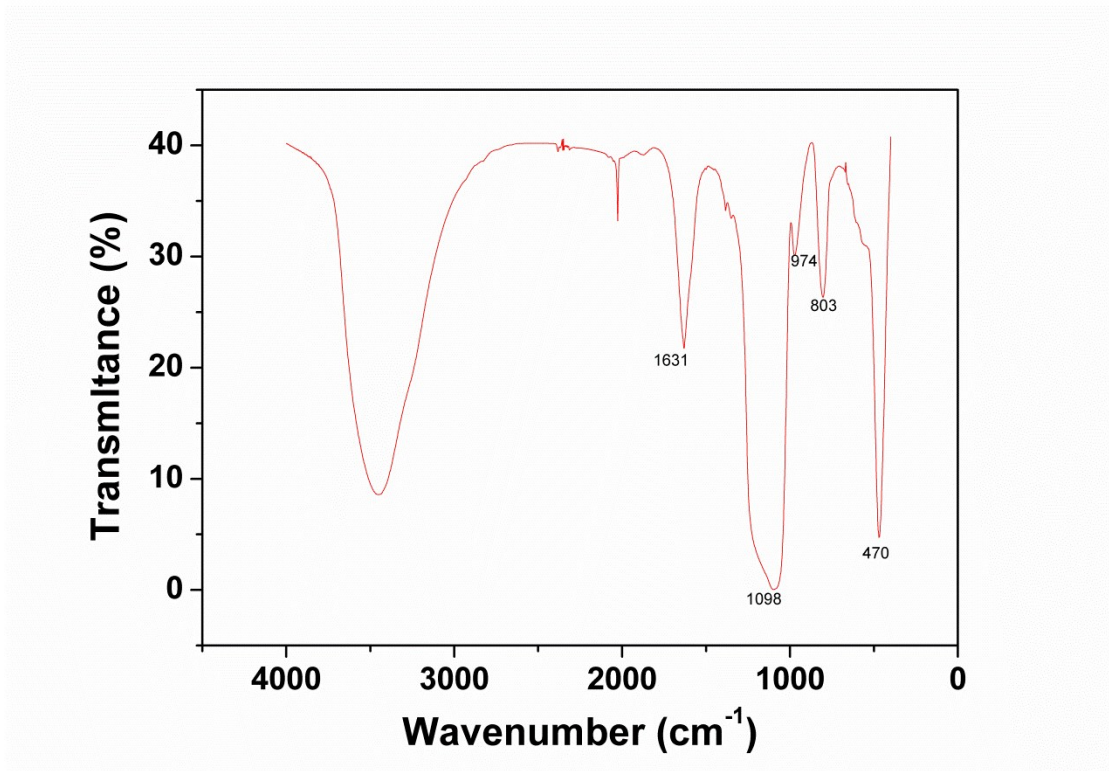

**Figure S4** FTIR spectrum of FSNSs
